# Supplementary material
Source: publisher figshare collection journal article supplement (https://acs.figshare.com/ndownloader/files/23623925)
Supplement: Supplementary file 1 [file 23623925]

## Supporting Information

### Cellulose Nanofibrils as Assay Substrates for Cellulases and Lytic Polysaccharide Monooxygenase

Alixander Perzon<sup>a\*</sup>, Benedikt M. Blossom<sup>b</sup>, Claus Felby<sup>b</sup>, Tina Jeoh<sup>c</sup>, Alex Hitomi<sup>c</sup>, Peter Ulvskov<sup>a</sup>, Bodil Jørgensen<sup>a</sup>

<sup>a</sup> Department of Plant and Environmental Sciences, Section for Glycobiology, University of Copenhagen, Thorvaldsensvej 40, 1871 Frederiksberg C, Denmark

<sup>b</sup> Department of Geosciences and Natural Resource Management, University of Copenhagen, 1958 Frederiksberg, Denmark

<sup>c</sup> Department of Biological and Agricultural Engineering, University of California Davis, One Shields Ave., Davis, CA 95616, US

The carboxyl group content of the cellulose nanofibrils (CNF) produced in the present study was calculated from the titration curves in Figure S1.

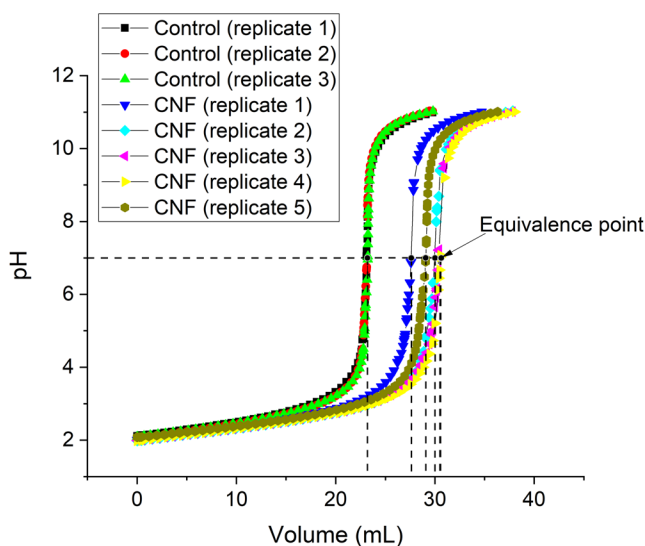

**Figure S1.** Titration curves and equivalence points for the control (20 mL of 10 mM HCl) and CNF (20 mL of 10 mM HCl, with 60 mg CNF added). The titrations were carried out with 10 mM NaOH.
